# Supplementary material for: Molecular basis for intestinal mucin recognition by galectin-3 and C-type lectins
Source: PubMed Central journal article supplement (PMC5976236; doi:10.1096/fj.201700619r), 2018-01-29
Supplement: fj.201700619R.sd1.pdf [file fj.201700619R.sd1.pdf]

## Supplemental data

**Figure S1 Separation of the guanidinium chloride insoluble mucins by SDS-PAGE (small proteins).**

Protein were detected by (A) Coomassie blue, (B) anti-MUC2, (C) WGA, (D) Alcian blue staining. The Coomassie blue staining shows the total proteins in the samples. 1- HiMark protein standard (Invitrogen, Thermo Fisher Scientific), 2-Fetuin (glycoprotein control), 3- BSA (glycosylation negative control), 4-WT SI Muc2, 5-*C3GnT*<sup>-/-</sup> SI Muc2, 6- WT colon Muc2, 7- *C3GnT*<sup>-/-</sup> colon Muc2, 8-pPGM, 9- LS174T MUC2

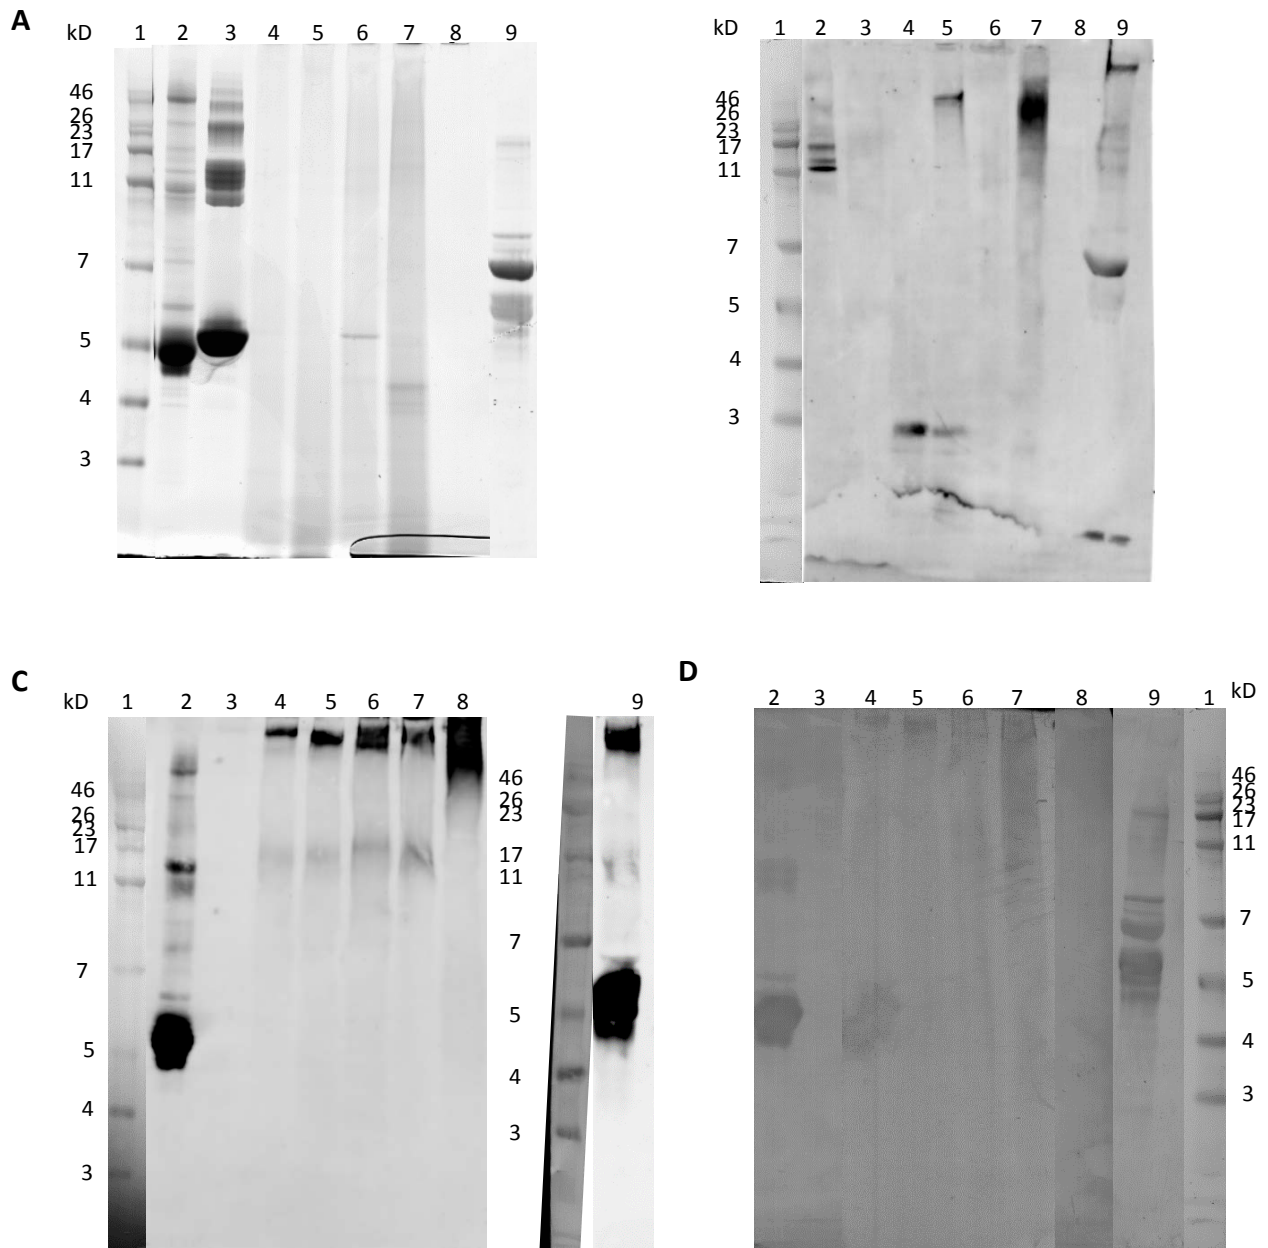

**Figure S2 Separation of the guanidinium chloride insoluble mucins by VAGE** (high molecular weight proteins). Proteins were detected by (A) anti-MUC2, (B) WGA, (C) Alcian blue staining. 1- HiMark protein standard, 2-Fetuin (glycoprotein control), 3- BSA (glycosylation negative control), 4-WT SI Muc2, 5-*C3GnT*<sup>-/-</sup> SI Muc2, 6- WT colon Muc2, 7- *C3GnT*<sup>-/-</sup> colon Muc2, 8-pPGM, 9- LS174T MUC2

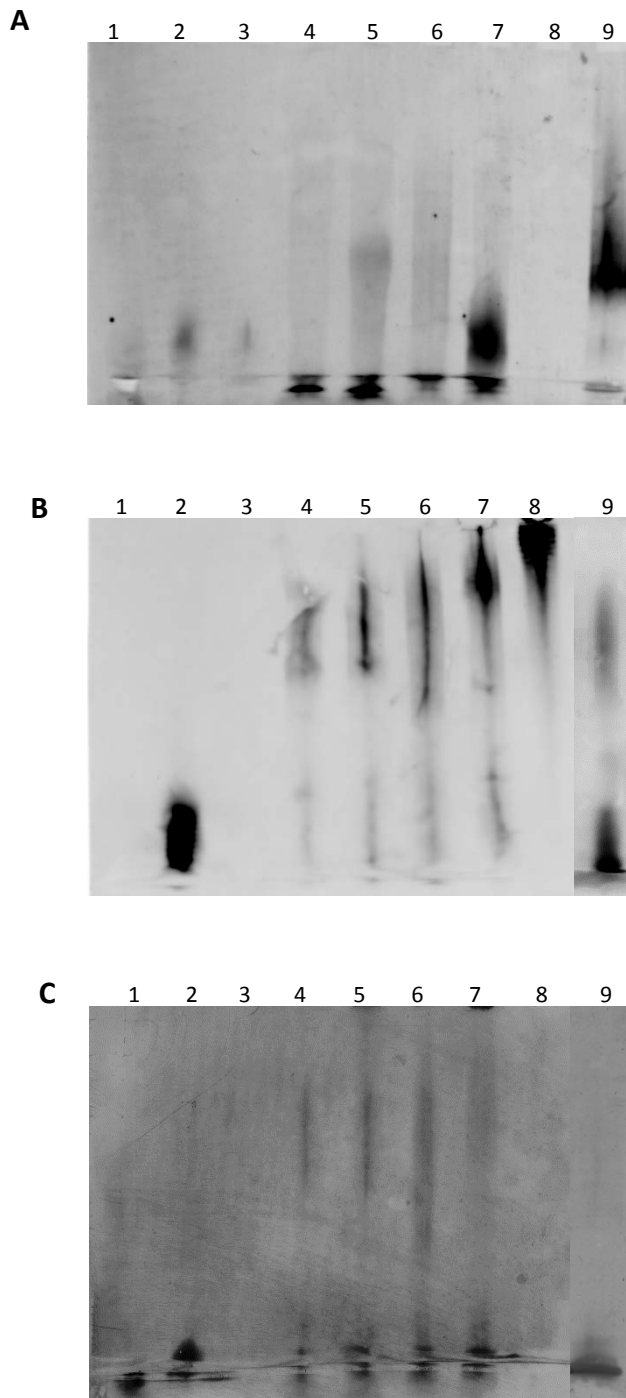

**Figure S3 MS/MS spectra of *O*-glycans from mice *Muc2*.**

*O*-glycans were fragmented in positive mode from (A) colon WT and *C3GnT*<sup>-/-</sup> mice and (B) from small intestine WT and *C3GnT*<sup>-/-</sup> mice. Monosaccharide symbols follow the Symbol Nomenclature for Glycans (SNFG) system (1). Key: fucose (red triangle), GlcNAc (blue square), sialic acid (purple diamond), galactose (yellow circle) and HexNAc (off-white square).

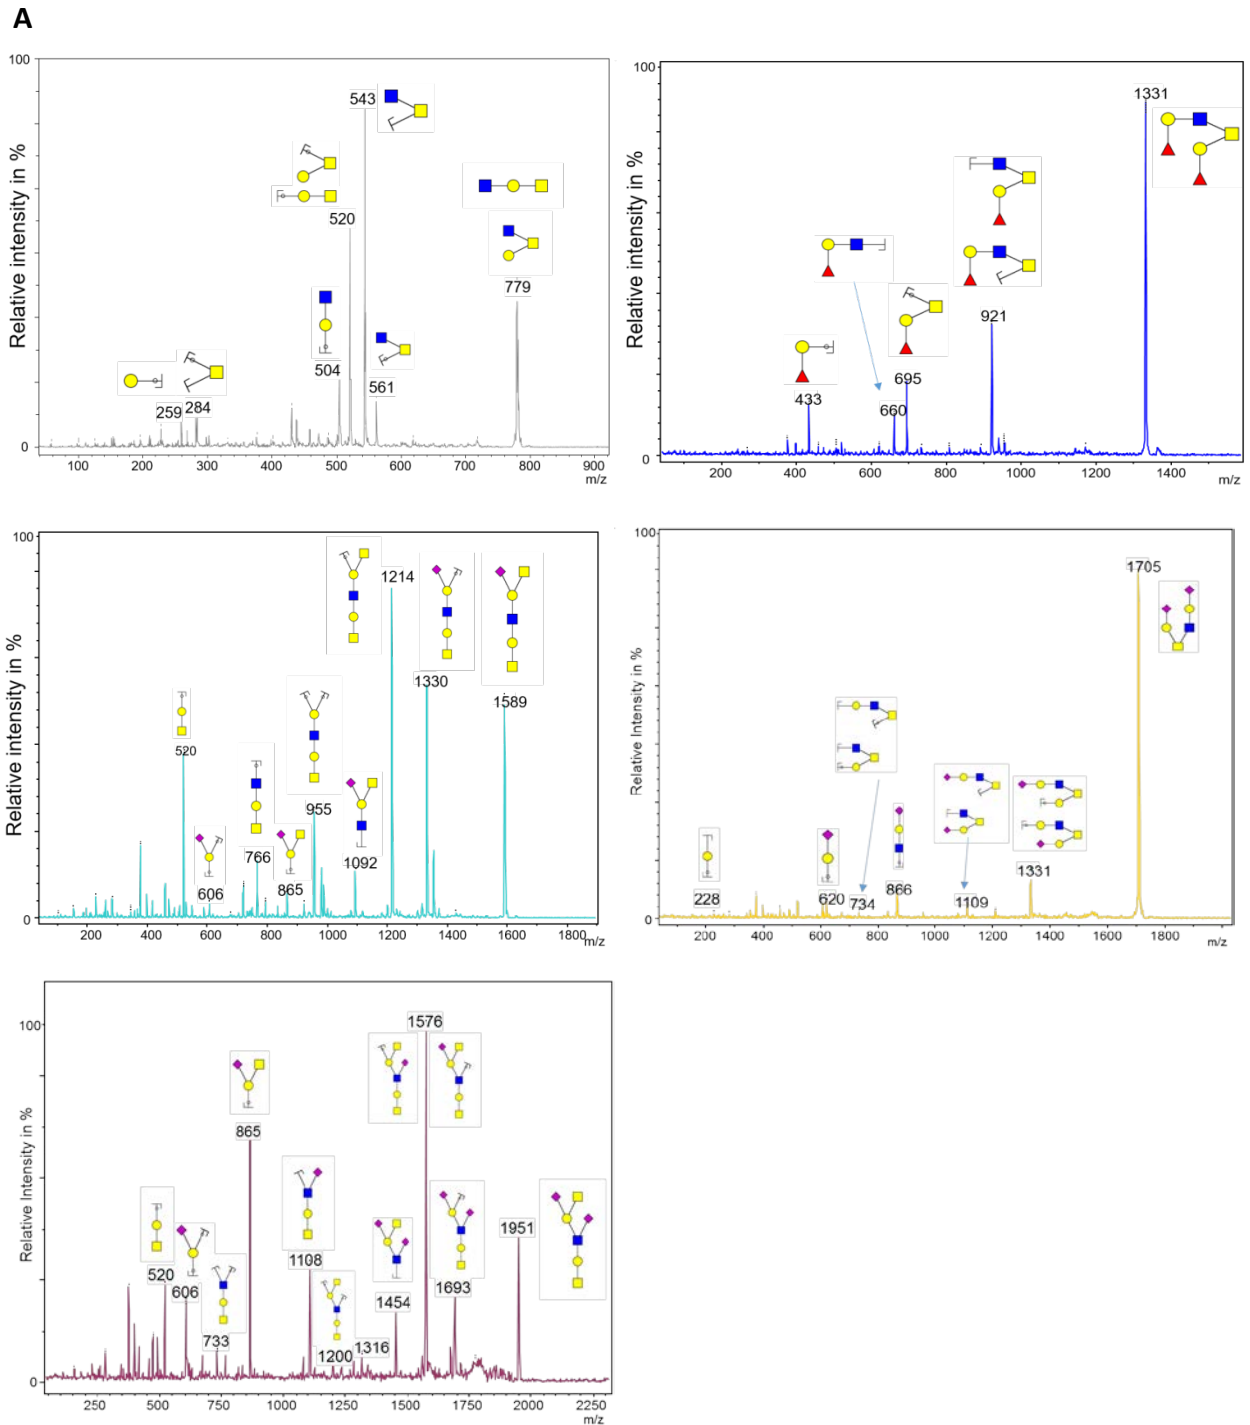

**B**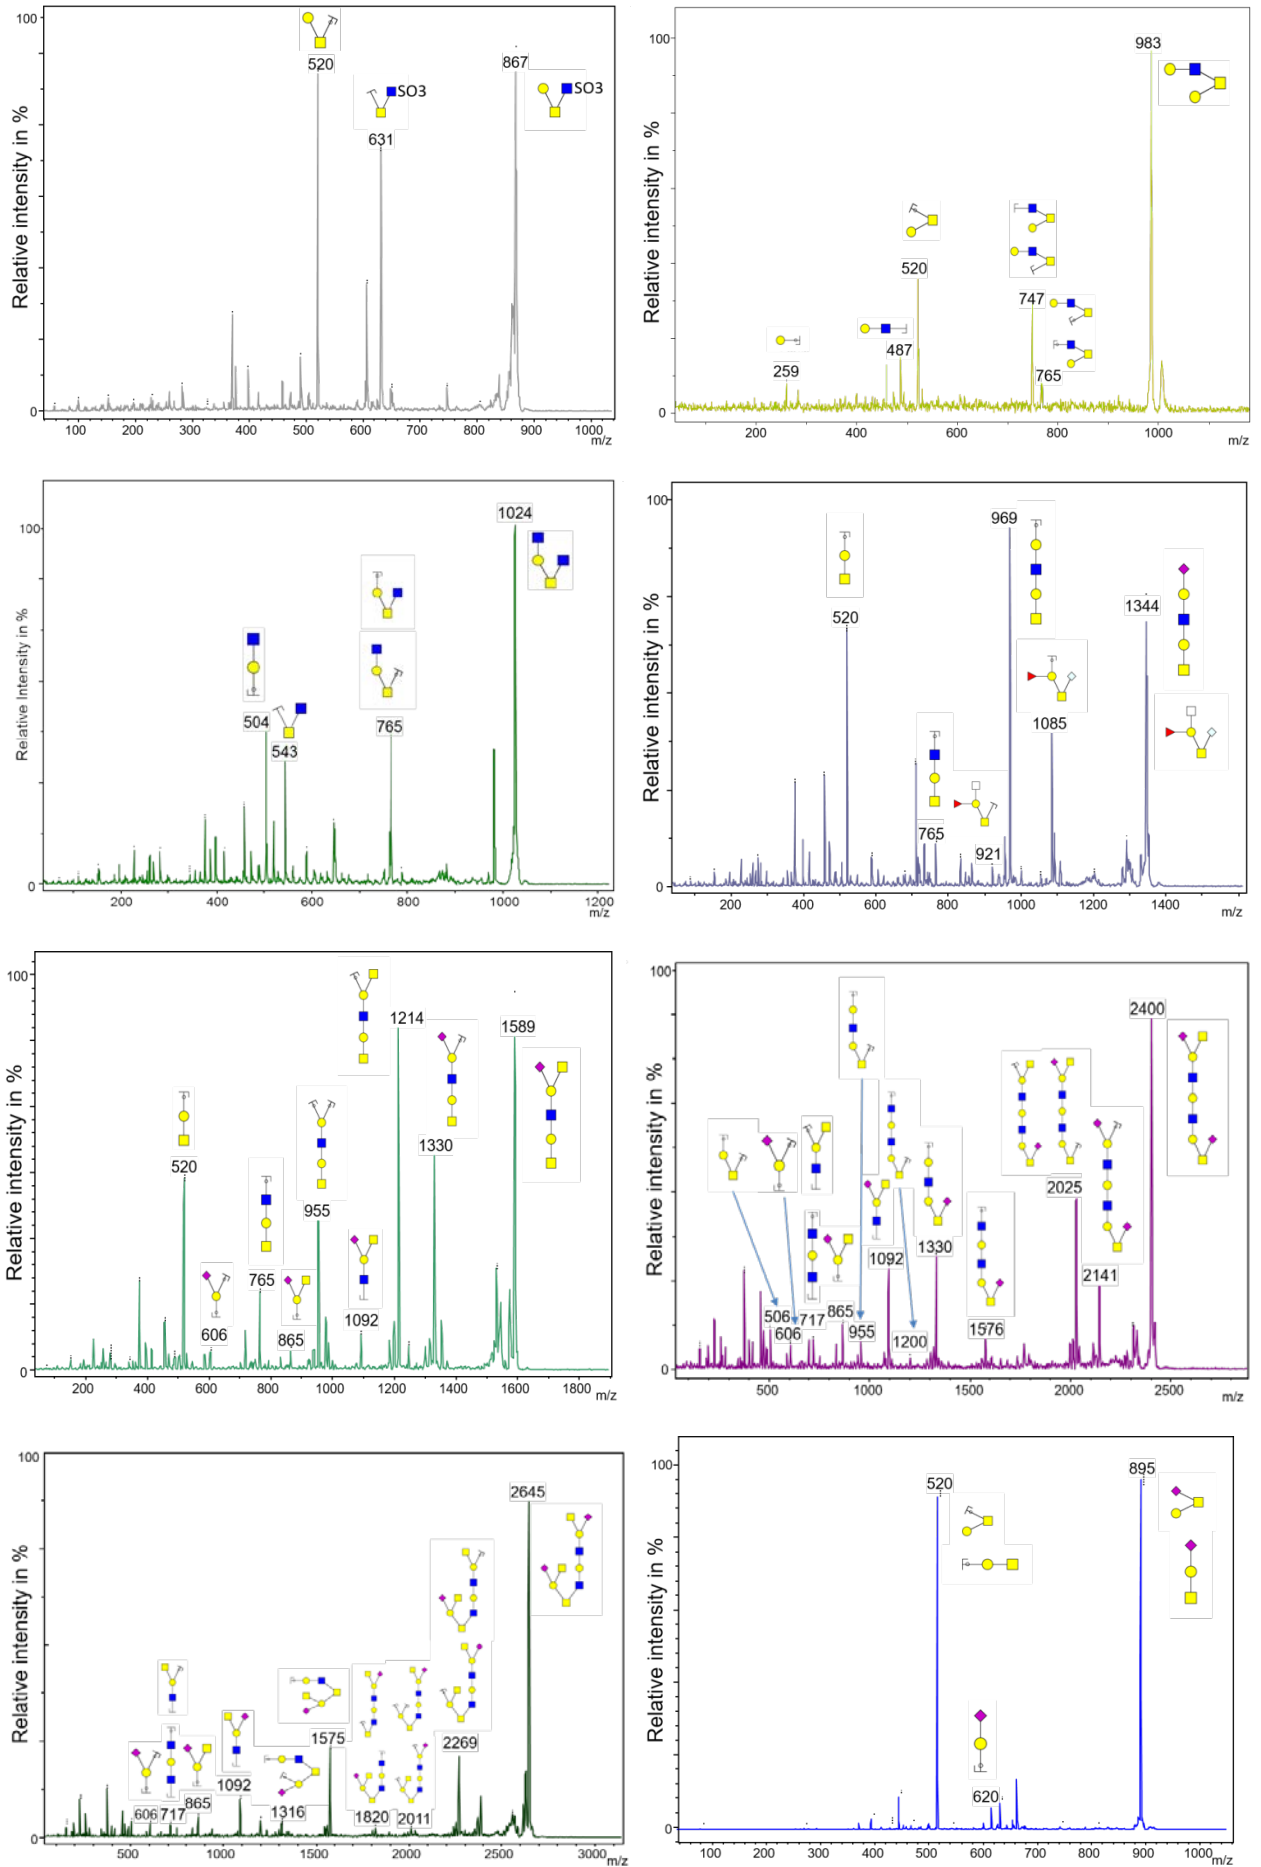

**Figure S4 Structural characterisation of pPGM *O*-glycan structures after deglycosylation cycles**

MALDI-MS spectra, acquired in the positive ion mode  $[M + Na]^+$  of permethylated *O*-glycans from pPGM after (A) one cycle of deglycosylation and (B) two cycles of deglycosylation. (C) shows a histogram of the different *O*-glycans found on pPGM after several cycles of deglycosylation. The proportion of each *O*-glycan is relative to other species in a sample Monosaccharide symbols follow the Symbol Nomenclature for Glycans (SNFG) system (1). Key: fucose (red triangle), GlcNAc (blue square), sialic acid (purple diamond), N-glycolyl sialic acid (light blue diamond), galactose (yellow circle), and HexNAc (off-white square).

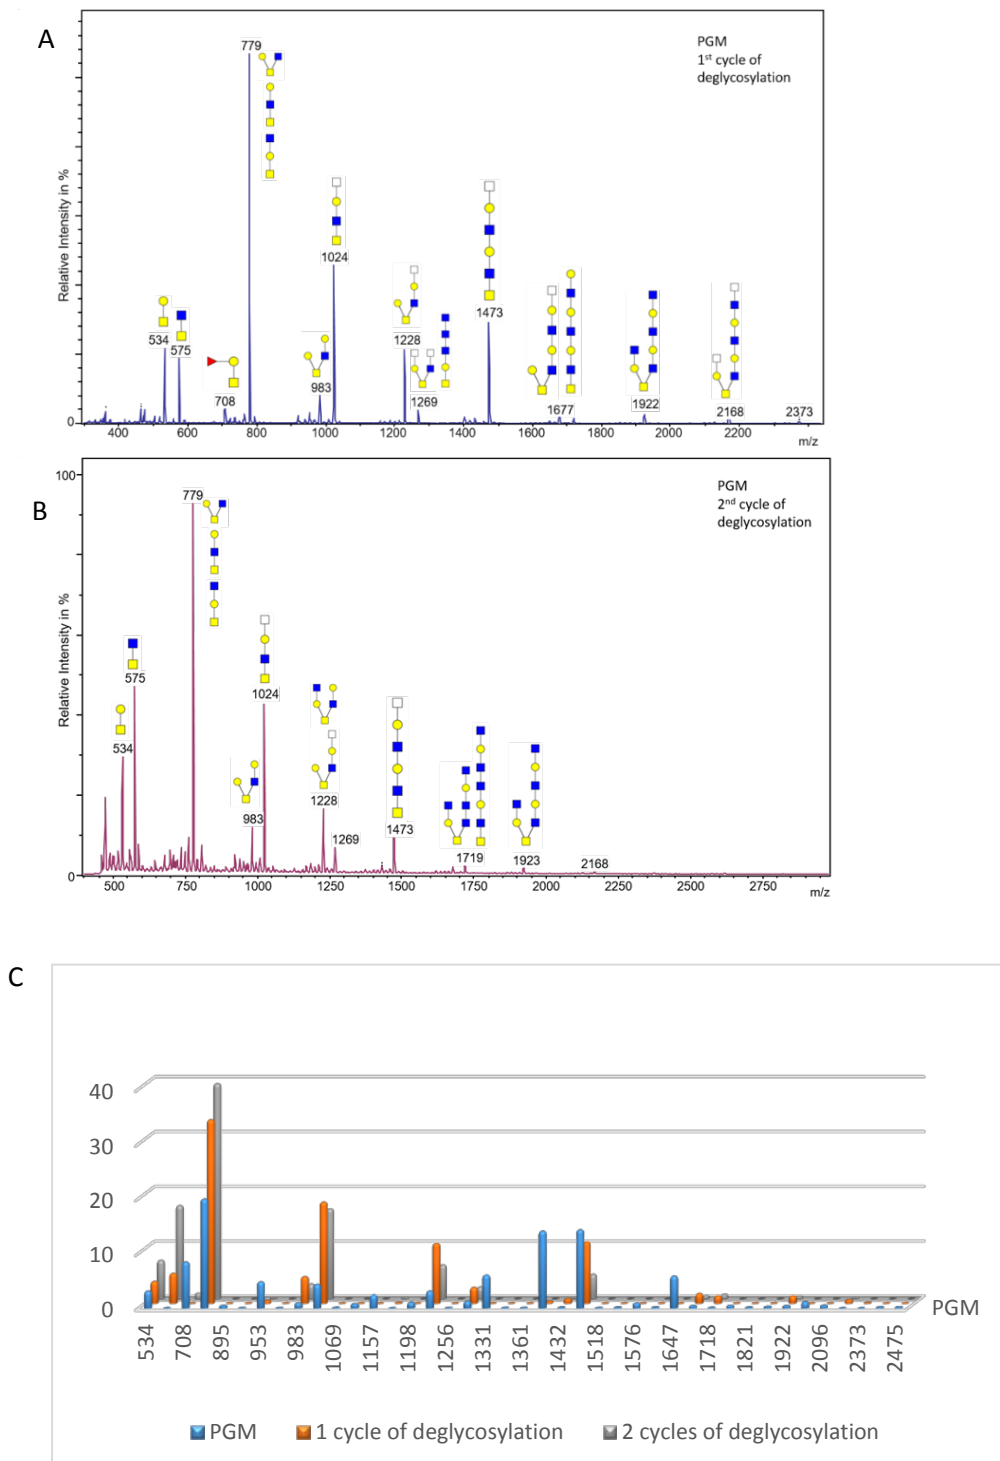

**Figure S5 Force spectra histograms of adhesion between human C-type lectins and mucin.** Interaction between WT colonic Muc2 and (A) hDectin-1, (B) hDectin-2, (C) DC-SIGN in presence or absence of potential inhibitors.

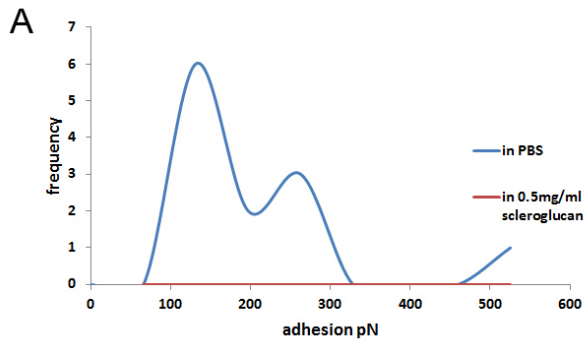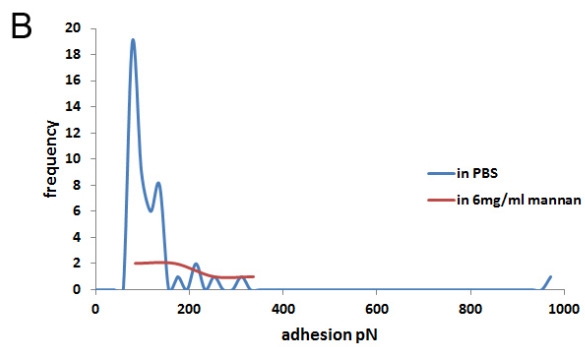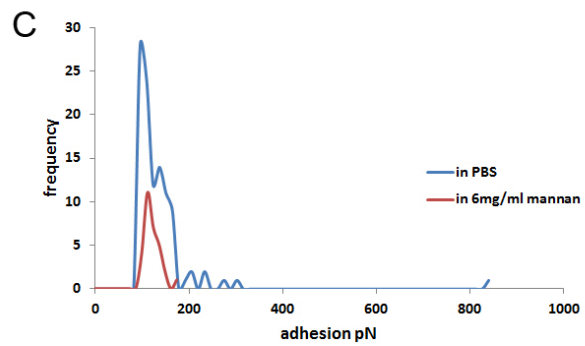

**Figure S6: MS/MS spectra of *N*-glycans from mDectin-2.**

MS/MS spectra of parent ion at  $m/z=2652$ ; 3275 and 3305 fragmented in positive mode. Monosaccharide symbols follow the Symbol Nomenclature for Glycans (SNFG) system (1). Key: fucose (red triangle), GlcNAc (blue square), sialic acid (purple diamond), galactose (yellow circle) and HexNAc (off-white square).

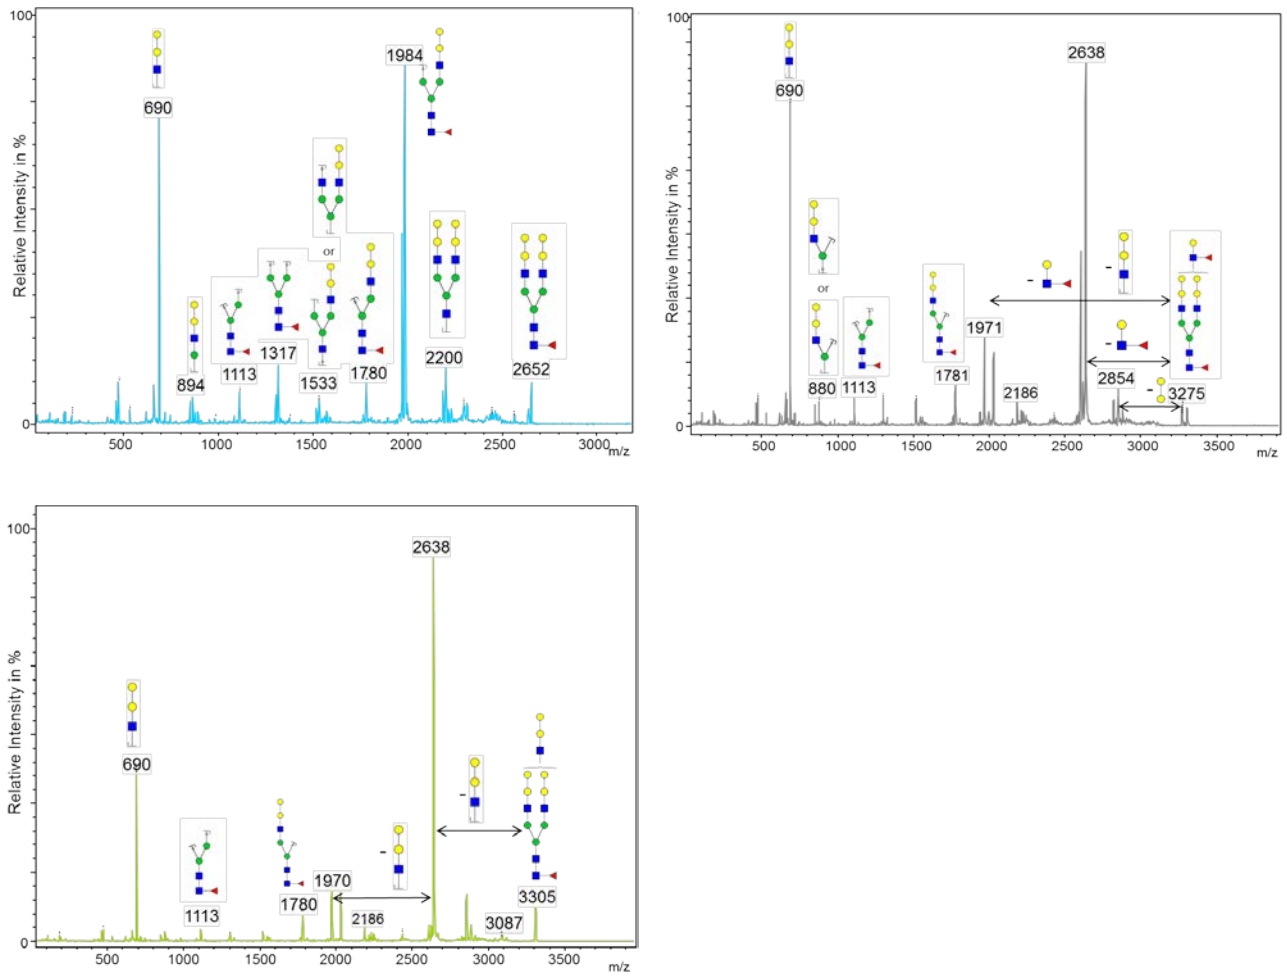

**Table S1 Proposed pPGM O-glycan structures after deglycosylation cycles.** Quantification through the relative percentage of each oligosaccharide was calculated based on integration of peaks on MS spectra.

| <i>Sequence of oligosaccharides</i>       | <b>mass</b> | <b>pPGM</b>       | <b>pPGM 1st cycle</b> | <b>pPGM 2nd cycle</b> |
|-------------------------------------------|-------------|-------------------|-----------------------|-----------------------|
|                                           |             | <b>relative %</b> | <b>relative %</b>     | <b>relative %</b>     |
| 1 Gal, GalNAcol                           | 534         | 3.18 +/-1.29      | 4.06 +/-3.25          | 7.03 +/-1.93          |
| HexNAc, GalNAcol                          | 575         |                   | 5.53 +/-5.66          | 17.02 +/-8.48         |
| 1 Gal, 1 Fuc, GalNAcol                    | 708         | 8.51 +/-2.12      |                       | 1.04 +/- 0.74         |
| 1 Gal, 1 HexNAc, GalNAcol                 | 779         | 19.99 +/-6.69     | 33.61 +/-2.67         | 39.30 +/-5.74         |
| 1 Gal, 1 NeuAc, GalNAcol                  | 895         | 0.55 +/-0.19      |                       |                       |
| 2 Gal, 1 Fuc, GalNAcol                    | 912         | 0.08 +/-0.12      |                       |                       |
| 1 Gal, 1 HexNAc, 1 Fuc, GalNAcol          | 953         | 4.87 +/-0.81      | 0.57 +/-0.24          | 0.09 +/-0.12          |
| NeuGc,HexNAc,GalNAcol                     | 967         | 0.09 +/-0.13      |                       |                       |
| 2 Gal, 1 HexNAc, GalNAcol                 | 983         | 1.06 +/-0.33      | 4.95 +/-1.52          | 2.70 +/-0.58          |
| 1 Gal, 2 HexNAc, GalNAcol                 | 1024        | 4.42 +/-0.34      | 18.55 +/-1.86         | 16.43 +/-5.44         |
| 1 Gal, 1 Fuc, 1 NeuAc, GalNAcol           | 1069        | 0.14 +/-0.20      |                       |                       |
| 1 Gal,1 HexNAc, 1 NeuAc, GalNAcol         | 1140        | 0.91 +/- 0.34     |                       |                       |
| 2 Gal, 1 HexNAc, 1 Fuc, GalNAcol          | 1157        | 2.49 +/-0.84      |                       |                       |
| 3 Gal, 1 HexNAc, GalNAcol                 | 1187        |                   | 0.15 +/-0.22          | 0.20 +/-0.28          |
| 1 Gal, 2 HexNAc, 1 Fuc, GalNAcol          | 1198        | 1.14 +/-0.31      |                       |                       |
| 2 Gal, 2 HexNAc, GalNAcol                 | 1228        | 3.19 +/-0.75      | 11.00 +/-1.22         | 6.18 +/-3.54          |
| 1 Gal, 2 NeuAc, GalNAcol                  | 1256        | 0.10 +/-0.14      |                       |                       |
| 1 Gal, 3 HexNAc, GalNAcol                 | 1269        | 1.36 +/-0.22      | 2.98 +/-1.08          |                       |
| 2 Gal, 1 HexNAc, 2 Fuc, GalNAcol          | 1331        | 6.11 +/-2.18      |                       | 2.13 +/-1.30          |
| 2 Gal, 1 HexNAc, 1 NeuAc, GalNAcol        | 1344        | 0.12 +/-0.14      |                       |                       |
| 3 Gal, 1 HexNAc, 1 Fuc, GalNAcol          | 1361        | 0.11 +/-0.15      |                       |                       |
| 2 Gal, 2 HexNAc, 1 Fuc, GalNAcol          | 1402        | 14.14 +/-0.73     | 0.44 +/-0.62          |                       |
| 3 Gal, 2 HexNAc, GalNAcol                 | 1432        | 0.19 +/-0.27      | 0.96 +/-0.88          | 0.17 +/-0.24          |
| 2 Gal, 3 HexNAc, GalNAcol                 | 1473        | 14.38 +/-2.84     | 11.30 +/-6.20         | 4.47 +/-3.06          |
| 2 Gal, 1 HexNAc, 1 Fuc, 1 NeuAc, GalNAcol | 1518        | 0.11 +/-0.15      |                       |                       |
| 3 Gal, 1 HexNAc, 2 Fuc, GalNAcol          | 1535        | 0.21 +/-0.30      |                       |                       |
| 2 Gal, 2 HexNAc, 2 Fuc, GalNAcol          | 1576        | 1.00 +/-0.72      |                       |                       |
| 3 Gal, 2 HexNAc, 1 Fuc, GalNAcol          | 1606        | 0.24 +/-0.34      |                       |                       |
| 2 Gal, 3 HexNAc, 1 Fuc, GalNAcol          | 1647        | 5.94 +/-0.96      |                       |                       |
| 3 Gal, 3 HexNAc, GalNAcol                 | 1677        | 0.49 +/-0.38      | 1.89 +/-0.72          | 0.65 +/-0.49          |
| 2 Gal, 4 HexNAc, GalNAcol                 | 1718        | 0.14 +/-0.20      | 1.46 +/-0.73          | 0.83 +/-0.63          |
| 3 Gal, 2 HexNAc, 2 Fuc, GalNAcol          | 1780        | 0.54 +/-0.43      |                       |                       |
| 2 Gal, 3 HexNAc, 2 Fuc, GalNAcol          | 1821        | 0.22 +/-0.31      |                       |                       |
| 3 Gal, 3 HexNAc, 1 Fuc, GalNAcol          | 1851        | 0.35 +/-0.49      |                       |                       |
| 3 Gal, 4 HexNAc, GalNAcol                 | 1922        | 0.51 +/-0.37      | 1.45 +/-0.05          | 0.52 +/-0.38          |
| 3 Gal, 3 HexNAc, 2 Fuc, GalNAcol          | 2025        | 1.26 +/-0.28      |                       |                       |
| 3 Gal, 4 HexNAc, 1 Fuc, GalNAcol          | 2096        | 0.58 +/-0.31      |                       |                       |
| 3 Gal, 5 HexNAc, GalNAcol                 | 2168        |                   | 0.75 +/-0.57          | 0.18 +/-0.25          |
| 4 Gal, 3 HexNAc, 3 Fuc, GalNAcol          | 2404        | 0.27 +/-0.27      |                       |                       |
| 4 Gal, 5 HexNAc, GalNAcol                 | 2373        |                   | 0.15 +/-0.22          |                       |
| 4 Gal, 4 HexNAc, 2 Fuc, GalNAcol          | 2475        | 0.26 +/-0.19      |                       |                       |



**Table S2 Proposed oligosaccharide structures of colonic WT and *C3GnT*<sup>-/-</sup> Muc2 N-glycans.** Reduced and alkylated mucins were digested by trypsin and then treated by PNGase F to release N-glycans. Quantification through the relative percentage of each oligosaccharide was calculated based on the integration of peaks from the MS spectra.

| <i>Proposed structures or sequence of oligosaccharides</i>                                                           | <i>[M+Na]<sup>+</sup></i> | <i>Relative %</i>                     |                      |
|----------------------------------------------------------------------------------------------------------------------|---------------------------|---------------------------------------|----------------------|
|                                                                                                                      |                           | <i>MUC2 Colon C3GnT<sup>-/-</sup></i> | <i>MUC2 Colon WT</i> |
| 3 Man, 2 GlcNAc<br>                 | 1171                      | 0,92                                  | -                    |
| 3 Man, 1 Fuc, 2 GlcNAc<br>          | 1345                      | 1,10                                  | -                    |
| 5 Man, 2 GlcNAc<br>                 | 1579                      | 10,12                                 | 5,57                 |
| 3 Man, 1 Fuc, 3 GlcNAc<br>         | 1590                      | -                                     | 1,11                 |
| 6 Man, 2 GlcNAc<br>               | 1783                      | 6,38                                  | 3,83                 |
| 3 Man, 1 Fuc, 4 GlcNAc<br>        | 1835                      | 2,25                                  | 3,20                 |
| 3 Man, 5 GlcNAc<br>               | 1906                      | -                                     | 1,53                 |
| 7 Man, 2 GlcNAc<br>               | 1987                      | 3,87                                  | 3,05                 |
| 1 Gal, 3 Man, 1 Fuc, 4 GlcNAc<br> | 2040                      | 2,09                                  | 2,12                 |
| 2 Gal, 3 Man, 4 GlcNAc<br>        | 2070                      | 1,80                                  | -                    |
| 1 Gal, 3 Man, 5 GlcNAc<br>        | 2111                      | 1,49                                  | 1,61                 |
| 8 Man, 2 GlcNAc<br>               | 2192                      | 5,59                                  | 4,17                 |
| 2 Gal, 3 Man, 1 Fuc, 4 GlcNAc<br> | 2244                      | 4,01                                  | 3,10                 |

|                                                                                                 |      |      |      |
|-------------------------------------------------------------------------------------------------|------|------|------|
| 1 Gal, 3 Man, 1 Fuc, 5 GlcNAc                                                                   | 2285 | 5,13 | 4,28 |
| 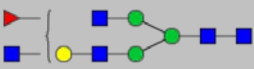               |      |      |      |
| 9 Man, 2 GlcNAc                                                                                 | 2396 | 6,91 | 7,16 |
|                |      |      |      |
| 2 Gal, 3 Man, 1 NeuAc, 4 GlcNAc                                                                 | 2431 | 1,30 | -    |
|                |      |      |      |
| 1 Gal, 5 Man, 1 Fuc, 4 GlcNAc ( <i>hybrid</i> )                                                 | 2448 | 1,46 | -    |
| 1 Gal, 3 Man, 2 Fuc, 5 GlcNAc                                                                   | 2459 | 1,87 | -    |
|                |      |      |      |
| 2 Gal, 3 Man, 1 Fuc, 5 GlcNAc                                                                   | 2489 | 3,06 | 3,13 |
|                |      |      |      |
| 1 Gal, 3 Man, 1 Fuc, 6 GlcNAc                                                                   | 2530 | -    | 2,69 |
|               |      |      |      |
| 3 Man, 1 Fuc, 5 HexNAc, 2 GlcNAc                                                                | 2571 | -    | 2,34 |
| 2 Gal, 3 Man, 1 NeuAc, 1 Fuc, 4 GlcNAc<br>( <i>biantennary monosialylated and fucosylated</i> ) | 2605 | 2,45 | 2,07 |
|              |      |      |      |
| 5 Hex, 1 Fuc, 1 NeuGc, 4 GlcNAc/ 6 Hex, 1 NeuAc, 4 GlcNAc ( <i>hybrid</i> )                     | 2635 | 2,53 | -    |
|              |      |      |      |
| 1 Gal, 3 Man, 1 NeuAc, 1 Fuc, 5 HexNAc                                                          | 2646 | 2,11 | 2,38 |
| 2 Gal, 3 Man, 2 Fuc, 5 GlcNAc                                                                   | 2663 | 1,69 | 2,25 |
|              |      |      |      |
| 2 Gal, 3 Man, 1 Fuc, 6 GlcNAc                                                                   | 2734 | 1,62 | 3,13 |
| 1 Gal, 3 Man, 1 Fuc, 5 HexNAc, 2 GlcNAc                                                         | 2775 | -    | 2,07 |
| 2 Gal, 3 Man, 3 Fuc, 6 GlcNAc                                                                   | 2837 | 2,00 | -    |
|              |      |      |      |
| 2 Gal, 3 Man, 1 Fuc, 1 NeuAc, 5 GlcNAc                                                          | 2850 | -    | 3,88 |
| 2 Gal, 3 Man, 2 NeuAc, 1 Fuc, 4 GlcNAc<br>( <i>biantennary disialylated and fucosylated</i> )   | 2966 | 2,62 | 3,49 |
|              |      |      |      |

|                                                                                 |      |      |       |
|---------------------------------------------------------------------------------|------|------|-------|
| 2 Gal, 3 Man, 1 Fuc, 5 HexNAc, 2 GlcNAc                                         | 2979 | -    | 2,34  |
| 2 Gal, 3 Man, 2 Fuc, 1 NeuAc, 3 HexNAc, 2 GlcNAc                                | 3024 | -    | 4,41  |
| 3 Gal, 3 Man, 1 Fuc, 5 HexNAc, 2 GlcNAc                                         | 3183 | -    | 2,22  |
| 2 Gal, 3 Man, 1 Fuc, 2 NeuAc, 5 GlcNAc                                          | 3211 | 8,27 | 10,31 |
|                                                                                 |      |      |       |
| 2 Gal, 3 Man, 1 Fuc, 6 HexNAc, 2 GlcNAc                                         | 3224 | -    | 2,79  |
| 2 Gal, 3 Man, 1 Fuc, 2 NeuAc, 6 GlcNAc                                          | 3456 | 5,23 | 3,57  |
| 3 Gal, 3 Man, 1 Fuc, 1 NeuAc, 7 GlcNAc                                          | 3544 | 2,95 | -     |
| 2 Gal, 3 Man, 1 Fuc, 3 NeuAc, 4 HexNAc, 2 GlcNAc                                | 3817 | -    | 3,19  |
| 1 Gal, 3 Man, 3 Fuc, 2 NeuAc, 7 GlcNAc / 3 Gal, 3 Man, 1 Fuc, 2 NeuAc, 7 GlcNAc | 3905 | 3,52 | -     |
| 3 Gal, 3 Man, 1 Fuc, 3 NeuAc, 7 GlcNAc                                          | 4267 | 5,70 | 2,99  |

**Table S3 Proposed oligosaccharide structures of C-type lectins N-glycans.** Quantification through the relative percentage of each oligosaccharide

| <i>Proposed structures or sequence of oligosaccharides</i> | <i>[M+Na]<sup>+</sup></i> | <i>Relative %</i> |                  |                |
|------------------------------------------------------------|---------------------------|-------------------|------------------|----------------|
|                                                            |                           | <i>mDectin-1</i>  | <i>mDectin-2</i> | <i>SIGN-R1</i> |
| 5 Man, 2 GlcNAc<br>                                        | 1579                      | -                 | -                | 14,94          |
| 3 Man, 1 Fuc, 3 GlcNAc<br>                                 | 1590                      | -                 | -                | 1,70           |
| 3 Man, 4 GlcNAc<br>                                        | 1661                      | -                 | -                | 1,37           |
| 6 Man, 2 GlcNAc<br>                                        | 1783                      | -                 | -                | 2,23           |
| 5 Man, 3 GlcNAc                                            | 1824                      | -                 | -                | 4,09           |
| 3 Man, 1 Fuc, 4 GlcNAc<br>                                 | 1835                      | -                 | -                | 2,30           |
| 7 Man, 2 GlcNAc<br>                                        | 1987                      | -                 | -                | 1,56           |
| 1 Gal, 3 Man, 1 Fuc, 4 GlcNAc<br>                          | 2040                      | 1,46              | -                | 2,78           |

|                                                                                        |      |       |       |       |
|----------------------------------------------------------------------------------------|------|-------|-------|-------|
| 1 Gal, 3 Man, 5 GlcNAc                                                                 | 2110 | -     | -     | 2,83  |
| 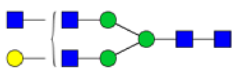      |      |       |       |       |
| 8 Man, 2 GlcNAc                                                                        | 2192 | -     | -     | 1,41  |
|       |      |       |       |       |
| 2 Gal, 3 Man, 1 Fuc, 4 GlcNAc                                                          | 2244 | 1,42  | -     | 5,05  |
|       |      |       |       |       |
| 1 Gal, 3 Man, 1 Fuc, 5 GlcNAc                                                          | 2285 | -     | -     | 7,54  |
|       |      |       |       |       |
| 9 Man, 2 GlcNAc                                                                        | 2396 | -     | -     | 0,86  |
|       |      |       |       |       |
| 1 Gal, 3 Man, 2 Fuc, 5 GlcNAc                                                          | 2459 | -     | -     | 2,56  |
|      |      |       |       |       |
| 2 Gal, 3 Man, 1 Fuc, 5 GlcNAc                                                          | 2489 | 5,16  | -     | 4,89  |
|     |      |       |       |       |
| 3 Man, 2 Fuc, 2 HexNAc, 4 GlcNAc                                                       | 2499 | -     | -     | 1,36  |
| 1 Gal, 3 Man, 1 Fuc, 6 GlcNAc                                                          | 2530 | -     | -     | 1,14  |
|     |      |       |       |       |
| 3 Man, 1 Fuc, 5 HexNAc, 2 GlcNAc                                                       | 2571 | -     | -     | 0,56  |
| 2 Gal, 3 Man, 1 NeuAc, 1 Fuc, 4 GlcNAc<br>(biantennary monosialylated and fucosylated) | 2605 | 0,93  | -     | 11,28 |
|     |      |       |       |       |
| 1 Gal, 3 Man, 3 Fuc, 5 GlcNAc                                                          | 2633 | -     | -     | 1,37  |
| 3 Gal, 3 Man, 1 NeuAc, 4 GlcNAc/ 2 Gal, 3 Man, 1 NeuGc, 1 Fuc, 4 GlcNAc                | 2636 | 5,96  | -     |       |
| 1 Gal, 3 Man, 1 NeuAc, 1 Fuc, 5 HexNAc                                                 | 2646 | -     | -     | 1,80  |
| 4 Gal, 3 Man, 4 GlcNAc, 1 Fuc                                                          | 2652 | 15,48 | 17,50 | -     |
|     |      |       |       |       |
| 2 Gal, 3 Man, 2 Fuc, 5 GlcNAc                                                          | 2663 | -     | -     | 1,54  |
|     |      |       |       |       |
| 2 Gal, 3 Man, 1 Fuc, 6 GlcNAc                                                          | 2734 | -     | -     | 0,75  |
| 2 Gal, 3 Man, 2 Fuc, 1 NeuAc, 4 GlcNAc                                                 | 2778 | -     | -     | 1,38  |

|                                                                                                          |      |       |       |      |
|----------------------------------------------------------------------------------------------------------|------|-------|-------|------|
| 2 Gal, 3 Man, 1 Fuc, 1 NeuAc, 5 GlcNAc                                                                   | 2850 | 1,67  | -     | 1,92 |
| 4 Hex, 2 NeuAc, 2 Fuc, 3 GlcNAc                                                                          | 2895 | 2,97  | -     | -    |
| 2 Gal, 3 Man, 2 NeuAc, 1 Fuc, 4 GlcNAc<br>(biantennary disialylated and fucosylated)                     | 2966 | -     | -     | 1,95 |
|                                                                                                          |      |       |       |      |
| 3 Man, 2 Fuc, 8 HexNAc                                                                                   | 2990 | 1,51  | -     | -    |
| 3 Gal, 3 Man, 1 NeuAc, 1 Fuc, 5 GlcNAc                                                                   | 3054 | -     | -     | 4,95 |
| 5 Gal, 3 Man, 5 GlcNAc, 1 Fuc                                                                            | 3101 | 5,93  | 2,64  | -    |
|                                                                                                          |      |       |       |      |
| 4 Gal, 3 Man, 1 Fuc, 6 GlcNAc                                                                            | 3142 | 4,83  | -     | 1,27 |
| 4 Gal, 3 Man, 5 GlcNAc, 3 Fuc                                                                            | 3245 | -     | 1,83  | -    |
| 5 Gal, 3 Man, 5 GlcNAc, 2 Fuc                                                                            | 3275 | 10,26 | 11,93 | -    |
|                                                                                                          |      |       |       |      |
| 3 Gal, 3 Man, 1 Fuc, 1 NeuAc, 6 GlcNAc                                                                   | 3298 | -     | -     | 0,80 |
| 6 Gal, 3 Man, 5 GlcNAc, 1 Fuc                                                                            | 3305 | 22,90 | 54,22 | -    |
|                                                                                                          |      |       |       |      |
| 2 Gal, 3 Man, 3 Fuc, 2 NeuAc, 4 GlcNAc                                                                   | 3314 | -     | -     | 0,62 |
| 2 Gal, 3 Man, 2 NeuGc, 3 Fuc, 4 GlcNAc                                                                   | 3374 | 4,47  | -     | -    |
| 2 Gal, 3 Man, 1 Fuc, 2 NeuAc, 6 GlcNAc                                                                   | 3414 | -     | -     | 1,67 |
| 4 Hex, 3 Man, 1 NeuAc, 2 Fuc, 3 HexNAc, 2<br>GlcNAc/ 3 Hex, 3 Man, 3 Fuc, 1 NeuGc, 3<br>HexNAc, 2 GlcNAc | 3432 | 1,57  | -     | -    |
| 5 Gal, 3 Man, 5 GlcNAc, 1 Fuc, 1 NeuAc/4 Gal,<br>3 Man, 5 GlcNAc, 2 Fuc, , 1 NeuGc                       | 3462 | 6,07  | 4,27  | -    |
| 5 Gal, 3 Man, 5 GlcNAc, 1 Fuc, 1 NeuGc/6 Gal,<br>3 Man, 2 GlcNAc, 3 HexNAc, 1 NeuAc                      | 3492 | 3,13  | 4,11  | -    |
| 2 Gal, 3 Man, 4 Fuc, 5 HexNAc, 2 GlcNAc                                                                  | 3501 | -     | -     | 1,20 |
| 3 Gal, 3 Man, 1 Fuc, 2 NeuAc, 6 GlcNAc                                                                   | 3660 | -     | -     | 0,63 |
| 4 Gal, 3 Man, 2 Fuc, 1 NeuAc, 6 GlcNAc                                                                   | 3677 | -     | -     | 1,28 |
| 7 Gal, 3 Man, 6 GlcNAc, 1 Fuc                                                                            | 3754 | 1,71  | 3,50  | -    |
| 4 Gal, 3 Man, 1 Fuc, 2 NeuAc, 6 GlcNAc                                                                   | 3863 | -     | -     | 1,68 |
| 4 Gal, 3 Man, 1 Fuc, 3 NeuAc, 6 GlcNAc                                                                   | 4226 | -     | -     | 0,92 |
